# Supplementary material for: A coumarin-based reversible fluorescent probe for Cu2+ and S2− and its applicability in vivo and for organism imaging
Source: Royal Society of Chemistry journal article supplement (doi:10.1039/d1nj01951a), 2021-01-01
Supplement: d1nj01951a1.pdf [file d1nj01951a1.pdf]

# A coumarin-based reversible fluorescent probe for Cu<sup>2+</sup> and S<sup>2-</sup> and its applicability in *in vivo* and organisms imaging

Wen Lu<sup>a\*</sup>, Jiuzhou Shi<sup>a</sup>, Jichao Chen<sup>b</sup>, Lu Sun<sup>a</sup>, Lingcen Shao<sup>a</sup>, Hongyu Ren<sup>a</sup>, Mengmeng Huang<sup>a</sup>,  
Yanqin Wang<sup>a</sup>, Shilong Yang<sup>c</sup>, Xu Li<sup>a\*</sup>

<sup>a</sup> College of Science, Nanjing Forestry University, Nanjing, Jiangsu, 210037, China

<sup>b</sup> College of Chemical Engineering, Nanjing Forestry University, Nanjing, Jiangsu, 210037, China.

<sup>c</sup>Advanced Analysis and Testing Center, Nanjing Forestry University, Nanjing, Jiangsu, 210037, China

\*Corresponding author: [luwen@njfu.edu.cn](mailto:luwen@njfu.edu.cn), [xuliqby@njfu.edu.cn](mailto:xuliqby@njfu.edu.cn)

## Table of contents

|                                                                                                |        |
|------------------------------------------------------------------------------------------------|--------|
| 1. IR spectrum of 3-acetyl-8-tert-butyl coumarin (BuCAC).                                      | Fig.S1 |
| 2. <sup>1</sup> H NMR spectrum of 3-acetyl-8-tert-butyl coumarin (BuCAC).                      | Fig.S2 |
| 3. <sup>13</sup> C HNMR spectra of 3-acetyl-8-tert-butyl coumarin (BuCAC).                     | Fig.S3 |
| 4. Mass spectrum of 3-acetyl-8-tert-butyl coumarin (BuCAC).                                    | Fig.S4 |
| 5. Experimental mass spectrum of BuCAC-Cu <sup>2+</sup> .                                      | Fig.S5 |
| 6. The optimized molecular structure of BuCAC.                                                 | Fig.S6 |
| 7. The optimized molecular structure of BuCAC-Cu <sup>2+</sup> .                               | Fig.S7 |
| 8. Compared with other currently reported probe for Cu <sup>2+</sup> and S <sup>2-</sup><br>S1 | Table  |
| 9. The HOMO and LUMO distributions of BuCAC and BuCAC-Cu <sup>2+</sup><br>S2                   | Table  |
| 10. Ethical Statement of Animal Experiment                                                     |        |

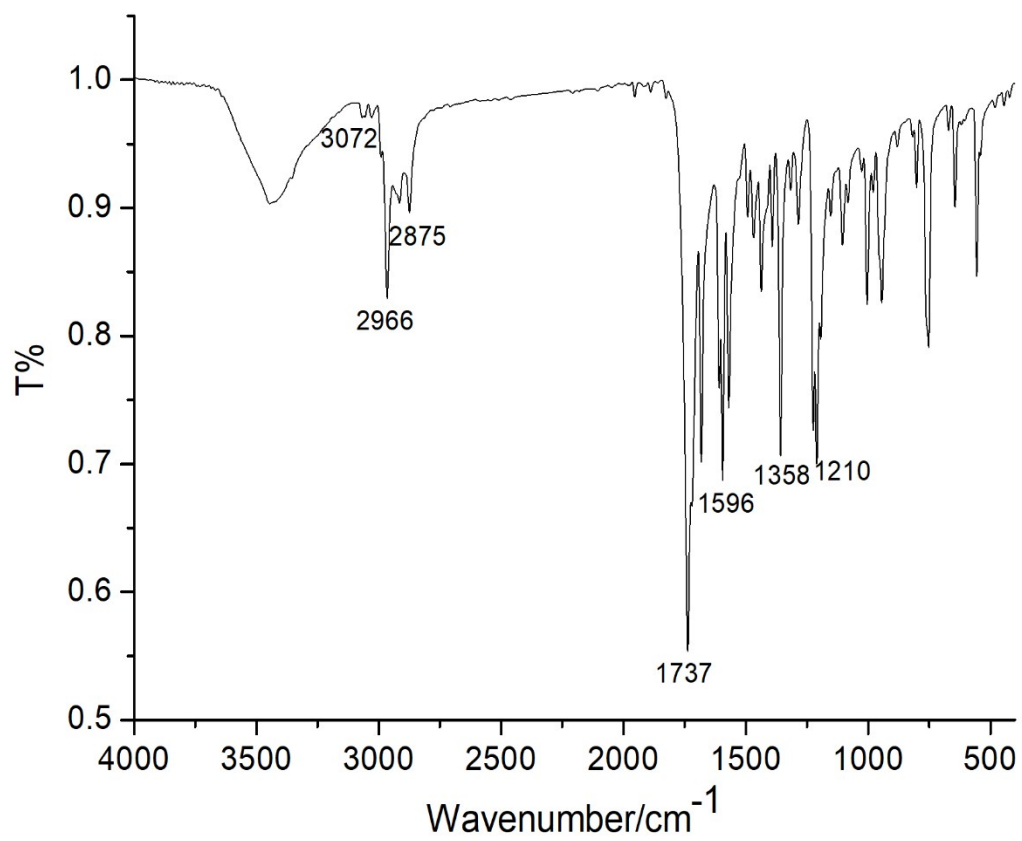

**Fig. S1.** IR spectrum of 3-acetyl-8-tert-butyl coumarin (**BuCAC**).

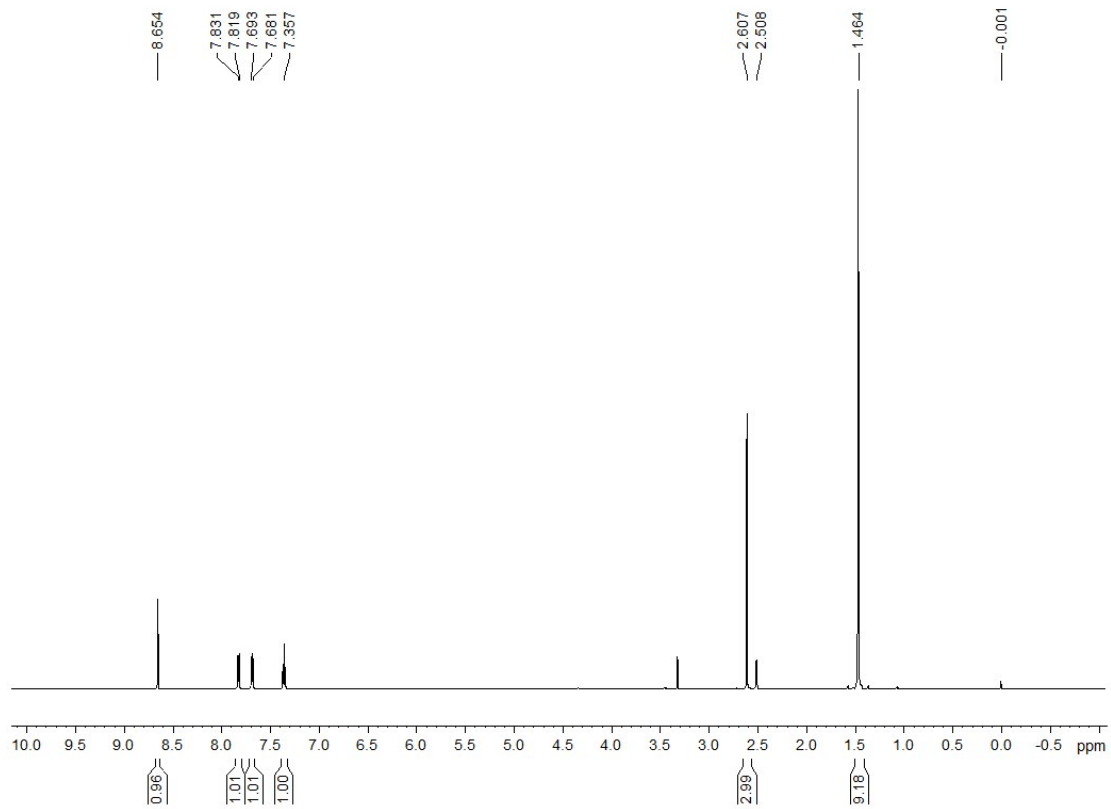

**Fig. S2.**  $^1\text{H}$  NMR spectrum of 3-acetyl-8-tert-butyl coumarin (**BuCAC**).

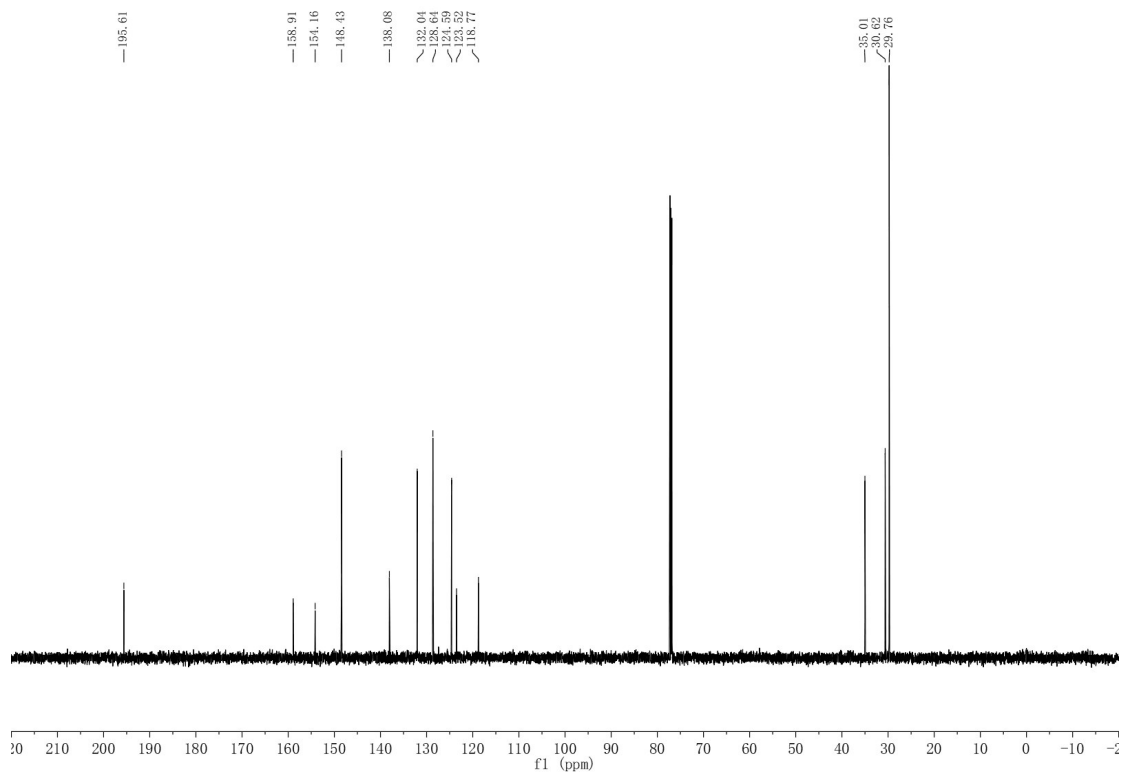

**Fig. S3.**  $^{13}\text{C}$  NMR spectrum of 3-acetyl-8-tert-butyl coumarin (**BuCAC**).

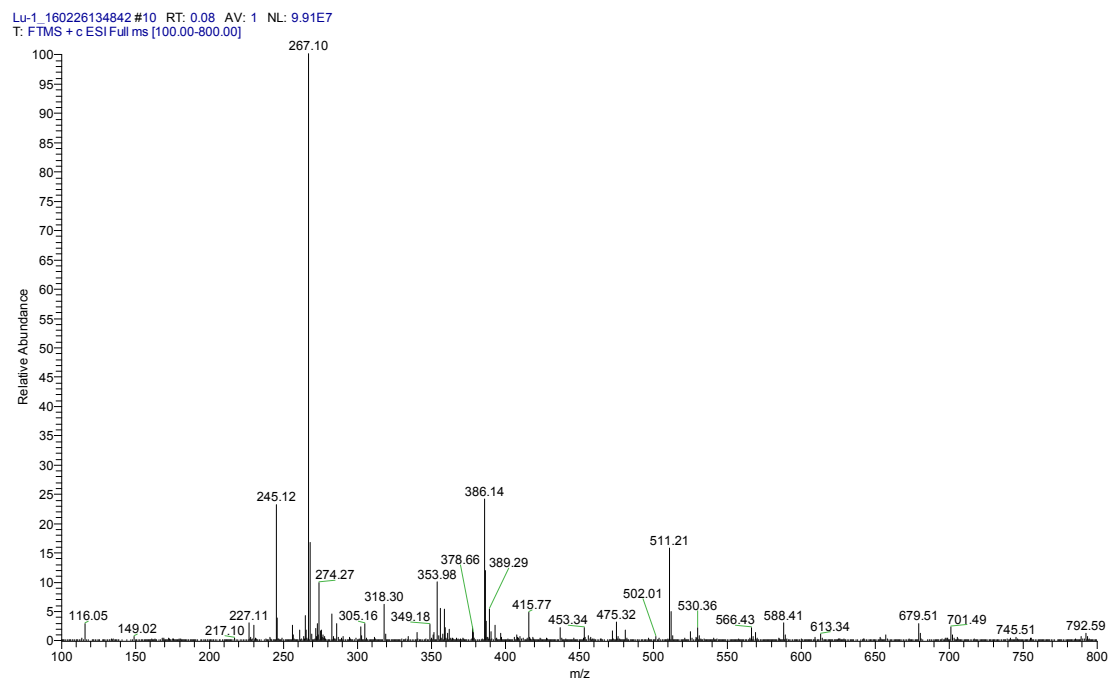

**Fig. S4.** 3-acetyl-8-tert-butyl coumarin (**BuCAC**).

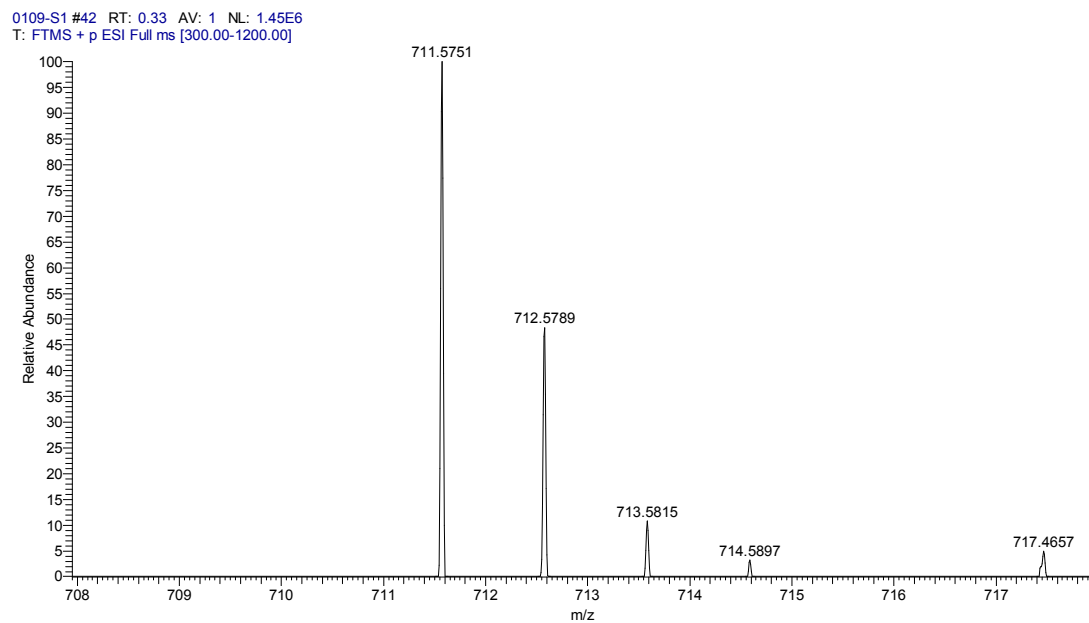

**Fig. S5.** Experimental mass spectrum of **BuCAC-Cu<sup>2+</sup>**.

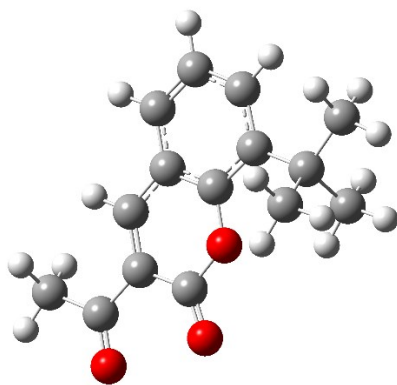

**Fig. S6** The optimized molecular structure of **BuCAC**.

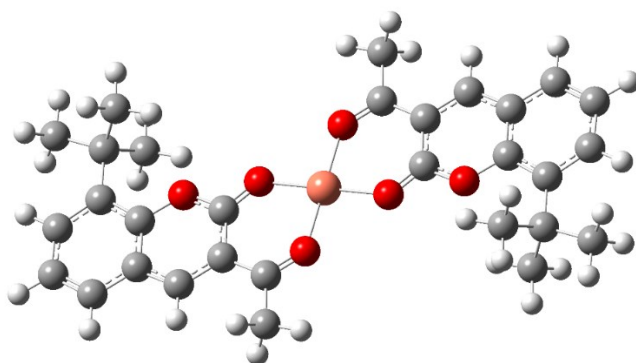

**Fig. S7** The optimized molecular structure of **BuCAC-Cu<sup>2+</sup>**.

**Table S1** Compared with other currently reported probe for **Cu<sup>2+</sup>** and **S<sup>2-</sup>**.

| Structure | Limit of detection           |                             | Ref              |
|-----------|------------------------------|-----------------------------|------------------|
|           | Cu <sup>2+</sup>             | S <sup>2-</sup>             |                  |
|           | <b>6.5×10<sup>-8</sup>M</b>  | <b>2.9×10<sup>-7</sup>M</b> | <b>39</b>        |
|           | <b>1.1×10<sup>-7</sup>M</b>  | <b>2.2×10<sup>-7</sup>M</b> | <b>40</b>        |
|           | <b>3.1×10<sup>-7</sup>M</b>  | <b>1.9×10<sup>-7</sup>M</b> | <b>41</b>        |
|           | <b>1.9×10<sup>-7</sup>M</b>  | <b>4.4×10<sup>-7</sup>M</b> | <b>42</b>        |
|           | <b>1.5×10<sup>-6</sup>M</b>  | <b>No data</b>              | <b>43</b>        |
|           | <b>3.03×10<sup>-7</sup>M</b> | <b>1.7×10<sup>-7</sup>M</b> | <b>This work</b> |

**Table S2** The HOMO and LUMO distributions of **BuCAC** and **BuCAC-Cu<sup>2+</sup>**.

|           | <b>BuCAC</b> | <b>BuCAC-Cu<sup>2+</sup></b> |                 |
|-----------|--------------|------------------------------|-----------------|
|           |              | $\alpha$ orbital             | $\beta$ orbital |
| LUMO (eV) | -2.636       | -8.743                       | -9.449          |
| HOMO (eV) | -6.826       | -12.248                      | -12.245         |
| Gap(eV)   | 4.190        | 3.505                        | 2.796           |

### **Ethical Statement of Animal Experiment**

All animal procedures were performed in accordance with the Guidelines for Care and Use of Laboratory Animals of "Nanjing Forestry" University and experiments were approved by the Animal Ethics Committee of "Nanjing Forestry University".
